# Supplementary material for: Performance and selectivity of lower-rim substituted calix[4]arene as a stationary phase for capillary gas chromatography
Source: Royal Society of Chemistry journal article supplement (doi:10.1039/c9ra03004b), 2019-01-01
Supplement: c9ra03004b1.pdf [file c9ra03004b1.pdf]

**Table S1** The chemical structures of the analytes

| Compounds         |                     | CAS       | Structure                                                                             |
|-------------------|---------------------|-----------|---------------------------------------------------------------------------------------|
| <i>n</i> -Alkanes | <i>n</i> -hexane    | 110-54-3  |    |
|                   | <i>n</i> -heptane   | 142-82-5  |     |
|                   | <i>n</i> -octane    | 111-65-9  |     |
|                   | <i>n</i> -nonane    | 111-84-2  |     |
|                   | <i>n</i> -decane    | 124-18-5  |     |
|                   | <i>n</i> -undecane  | 1120-21-4 |     |
|                   | <i>n</i> -dodecane  | 112-40-3  |     |
|                   | <i>n</i> -tridecane | 629-50-5  |     |
| Esters            | methyl valerate     | 624-24-8  |     |
|                   | methyl hexanoate    | 106-70-7  |     |
|                   | methyl heptanoate   | 106-73-0  |   |
|                   | methyl octanoate    | 111-11-5  |   |
|                   | methyl nonanoate    | 1731-84-6 |   |
|                   | methyl decanoate    | 110-42-9  |   |
|                   | methyl undecanoate  | 1731-86-8 |   |
|                   | methyl dodecanoate  | 111-82-0  |   |
| Ketones           | 2-pentanone         | 107-87-9  |  |
|                   | 2-hexanone          | 591-78-6  |   |
|                   | 2-heptanone         | 110-43-0  |   |
|                   | 2-octanone          | 111-13-7  |   |
|                   | 2-nonanone          | 821-55-6  |   |

|              |                 |           |                                                                                      |
|--------------|-----------------|-----------|--------------------------------------------------------------------------------------|
|              | 2-decanone      | 693-54-9  | 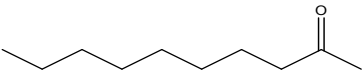   |
|              | 2-undecanone    | 112-12-9  |    |
|              | 2-dodecanone    | 6175-49-1 |    |
| Aldehydes    | valeraldehyde   | 110-62-3  |    |
|              | hexaldehyde     | 66-25-1   |    |
|              | heptaldehyde    | 111-71-7  |    |
|              | octanal         | 124-13-0  |    |
|              | nonanal         | 124-19-6  |    |
|              | decanal         | 112-31-2  |    |
|              | undecanal       | 112-44-7  |    |
|              | dodecanal       | 112-54-9  |    |
| Alcohols     | 1-pentanol      | 71-41-0   |  |
|              | 1-hexanol       | 111-27-3  |  |
|              | 1-heptanol      | 111-70-6  |  |
|              | 1-octanol       | 111-87-5  |  |
|              | 1-nonanol       | 143-08-8  |  |
|              | 1-decanol       | 112-30-1  |  |
|              | 1-undecanol     | 112-42-5  |  |
|              | 1-dodecanol     | 112-53-8  |  |
| Bromoalkanes | 1-bromopentane  | 110-53-2  |  |
|              | 1-bromohexane   | 111-25-1  |  |
|              | 1-bromoheptane  | 629-04-9  |  |
|              | 1-bromooctane   | 111-83-1  |  |
|              | 1-bromononane   | 693-58-3  |  |
|              | 1-bromodecane   | 112-29-8  |  |
|              | 1-bromoundecane | 693-67-4  |  |

|          |                             |            |                                                                                       |
|----------|-----------------------------|------------|---------------------------------------------------------------------------------------|
|          | 1-bromododecane             | 143-15-7   | 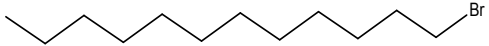    |
| Benzenes | toluene                     | 108-88-3   |    |
|          | ethylbenzene                | 100-41-4   |    |
|          | 3,4,5-trichlorobenzaldehyde | 56961-76-3 |     |
|          | benzaldehyde                | 100-52-7   |     |
|          | 1,4-dichlorobenzene         | 106-46-7   |    |
|          | acetophenone                | 98-86-2    |  |
|          | phenol                      | 108-95-2   |  |
|          | 1,3-dibromobenzene          | 108-36-1   |   |
|          | 1,2-dibromobenzene          | 583-53-9   |  |
|          | cumene                      | 98-82-8    |  |
|          | propylbenzene               | 103-65-1   |   |

|  |                        |          |                                                                                       |
|--|------------------------|----------|---------------------------------------------------------------------------------------|
|  | sec-butylbenzene       | 135-98-8 | 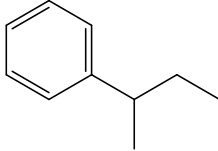    |
|  | n-butylbenzene         | 104-51-8 |     |
|  | mesitylene             | 108-67-8 |    |
|  | 1,2,4-trimethylbenzene | 95-63-6  |    |
|  | 1,2,3-trimethylbenzene | 526-73-8 |    |
|  | 1,3,5-trichlorobenzene | 108-70-3 |    |
|  | 1,2,4-trichlorobenzene | 120-82-1 |   |
|  | 1,2,3-trichlorobenzene | 87-61-6  |  |
|  | 3-nitrochlorobenzene   | 121-73-3 |   |
|  | 4-nitrochlorobenzene   | 100-00-5 |   |

|              |                         |          |                                                                                       |
|--------------|-------------------------|----------|---------------------------------------------------------------------------------------|
|              | 2-nitrochlorobenzene    | 88-73-3  | 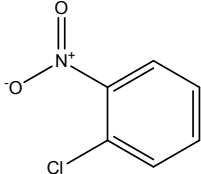   |
| Naphthalenes | 2-methylnaphthalene     | 91-57-6  |     |
|              | 1-methylnaphthalene     | 90-12-0  |    |
| Amines       | <i>o</i> -chloroaniline | 95-51-2  |    |
|              | <i>m</i> -chloroaniline | 108-42-9 |     |
|              | <i>p</i> -chloroaniline | 106-47-8 |    |
|              | <i>o</i> -bromoaniline  | 615-36-1 |  |
|              | <i>m</i> -bromoaniline  | 591-19-5 |   |
|              | <i>p</i> -bromoaniline  | 106-40-1 |   |
|              | <i>o</i> -iodoaniline   | 615-43-0 |  |
|              | <i>m</i> -iodoaniline   | 626-01-7 |   |
|              | <i>p</i> -iodoaniline   | 540-37-4 |   |
